# Supplementary material for: Syndecan-4 in microglia mediates ischemic stroke-induced mitochondrial dysfunction and blood-brain barrier damage by interacting with Dishevelled
Source: Research Square preprint supplement (doi:10.21203/rs.3.rs-8263184/v1), 2025-12-24

**Figure5**

βactin 42kd


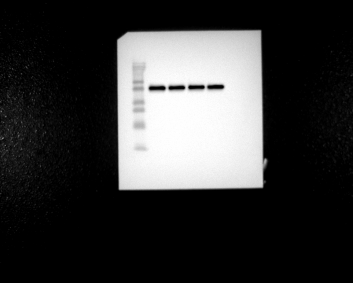

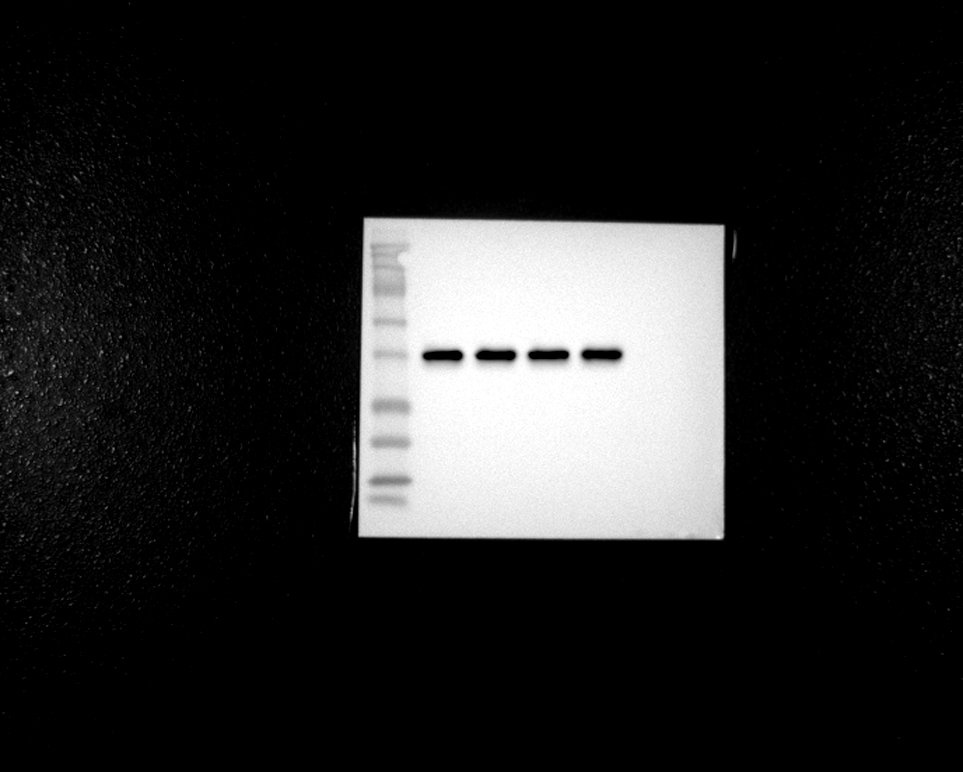

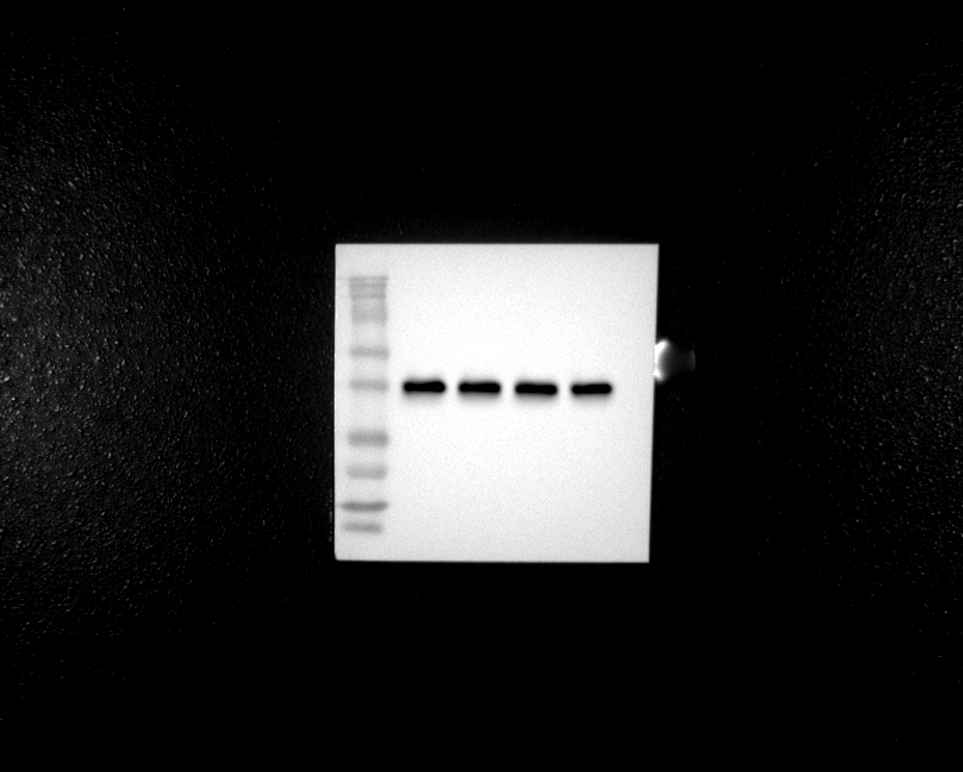


SDC 24kd


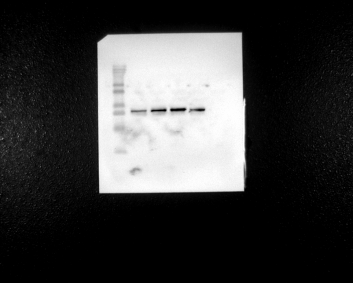

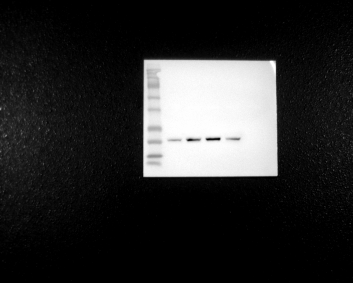

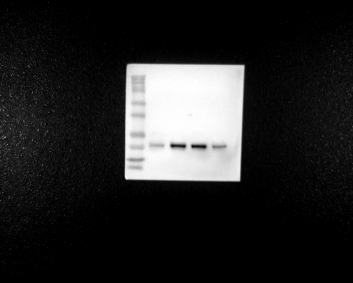


**Figure6**

βactin 42kd


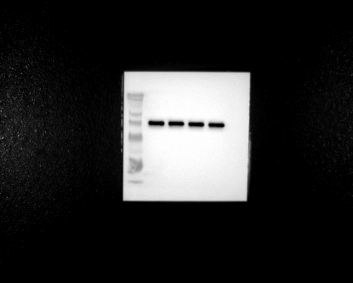

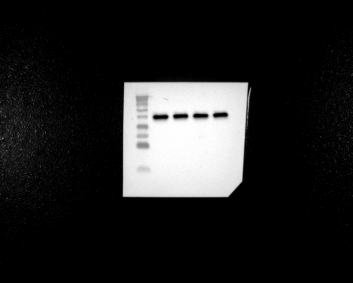

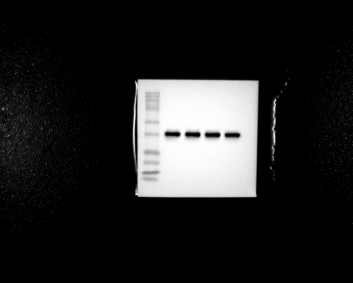


SDC 24kd


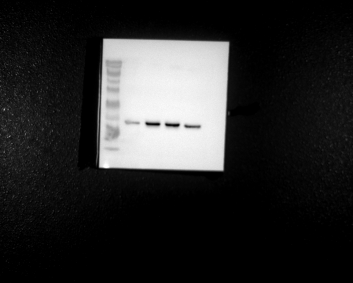

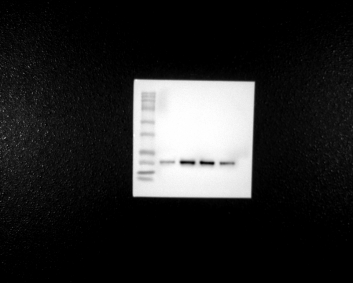

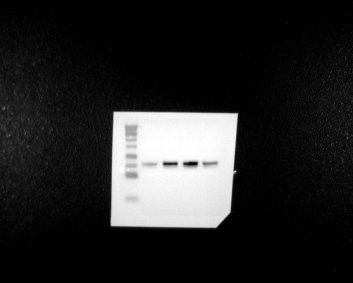


**Figure7**

βactin 42kd

**
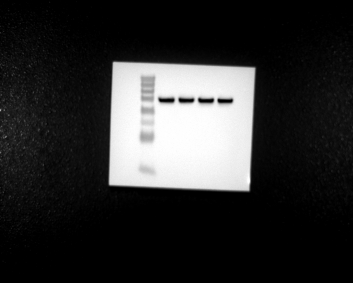

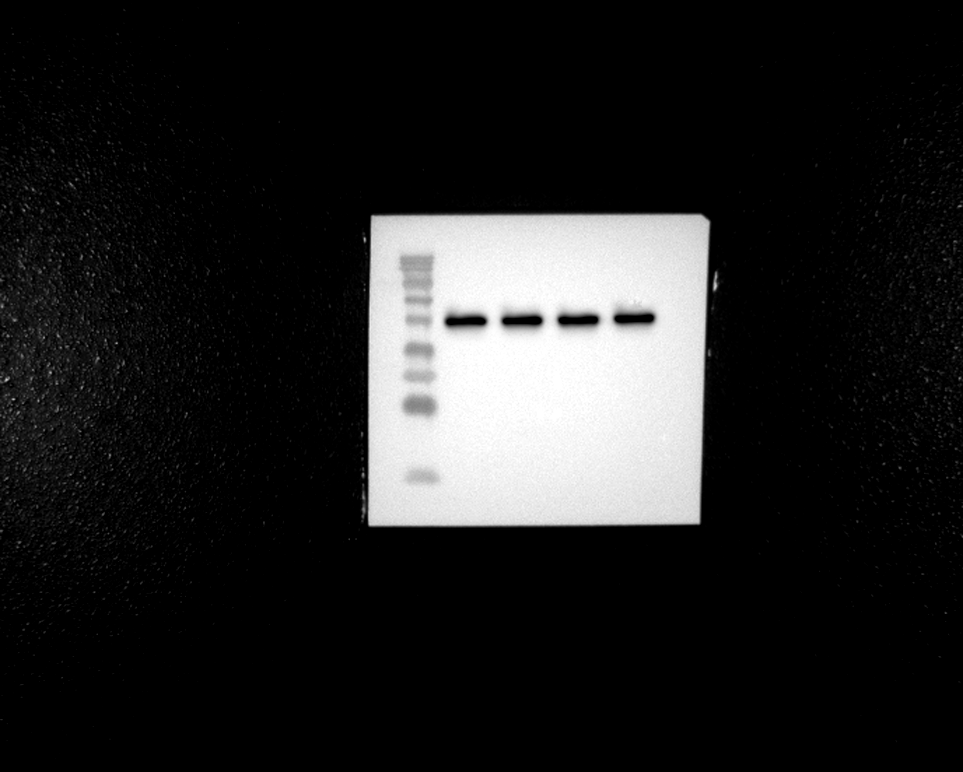

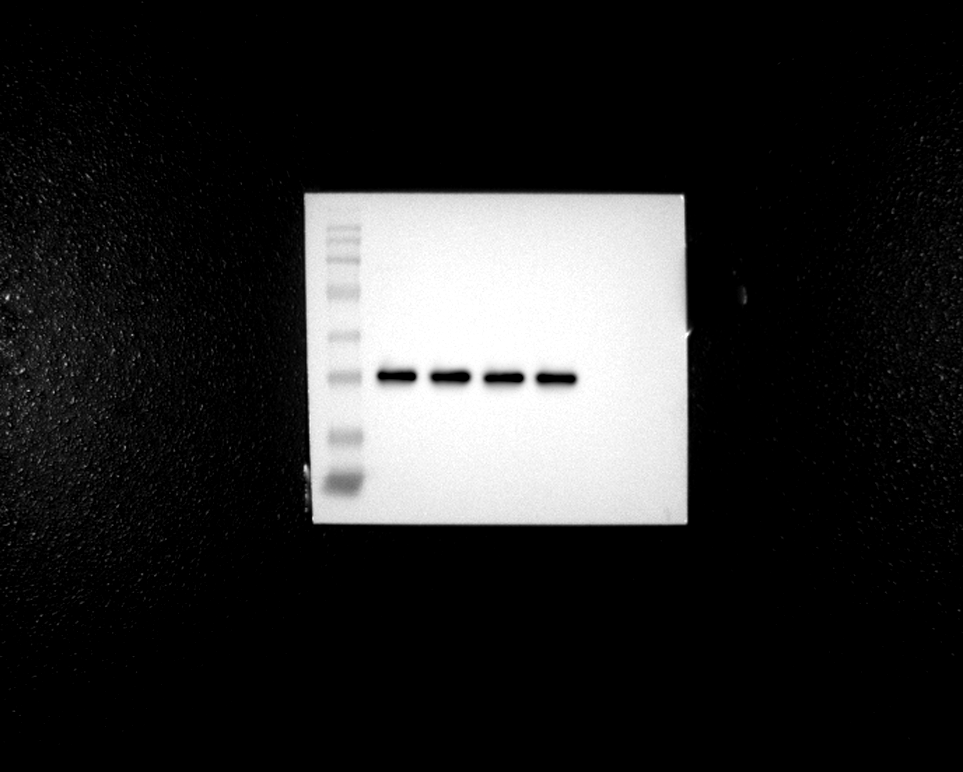
**

Cytosolic Cyt c 12kd


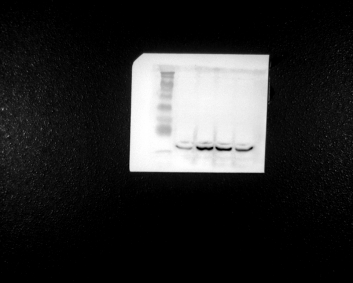

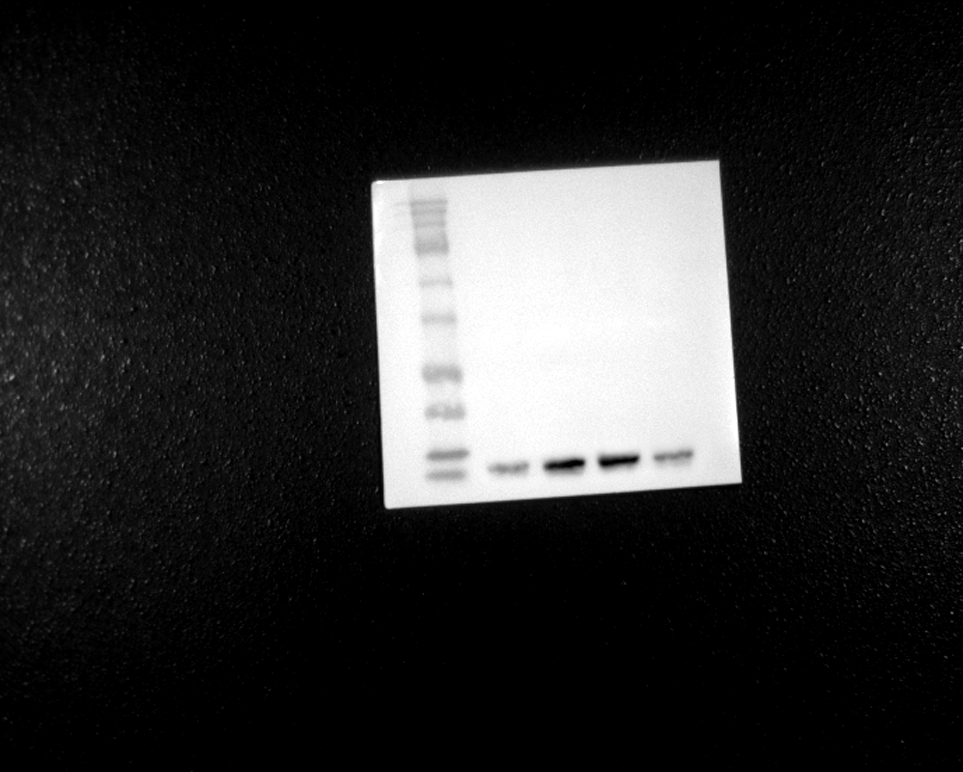

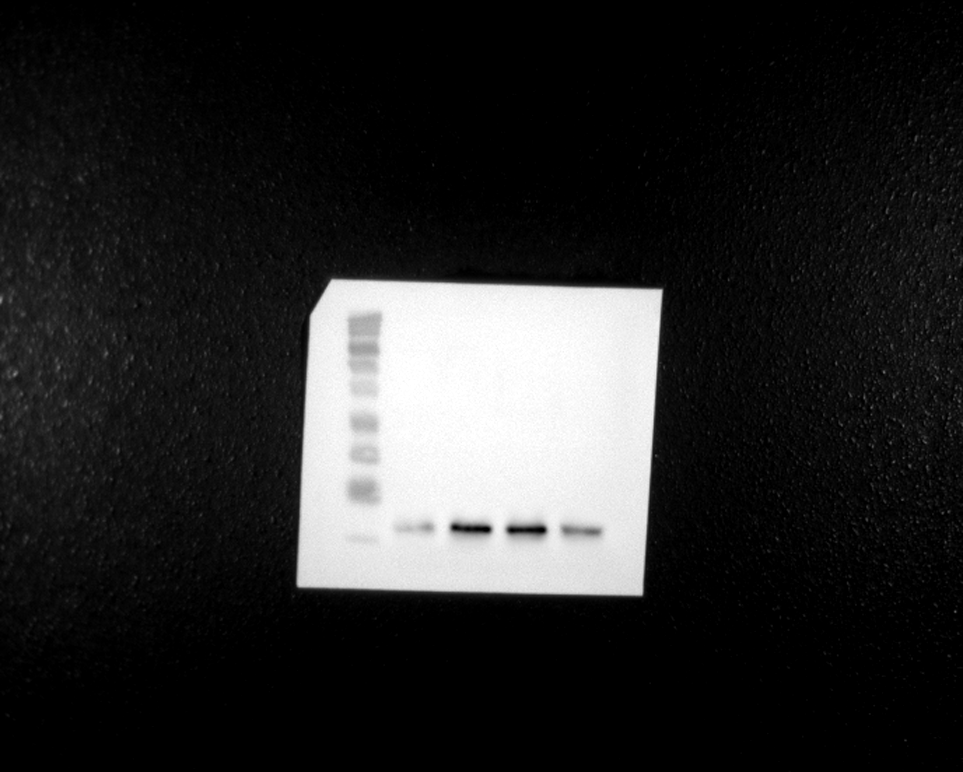


Cytosolic AIF 67kd


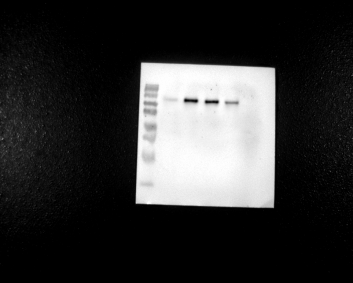

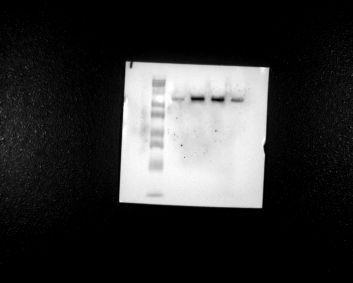

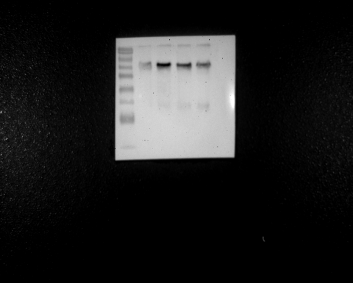


Tomm20 16kd


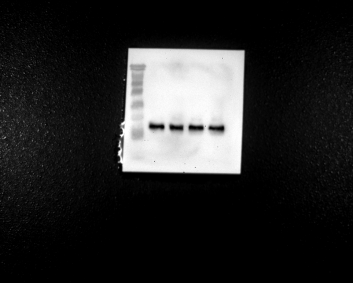

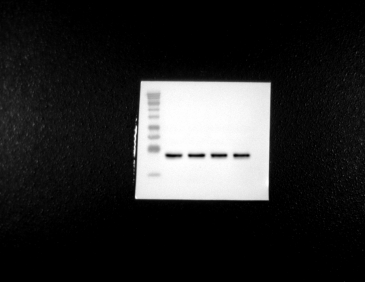

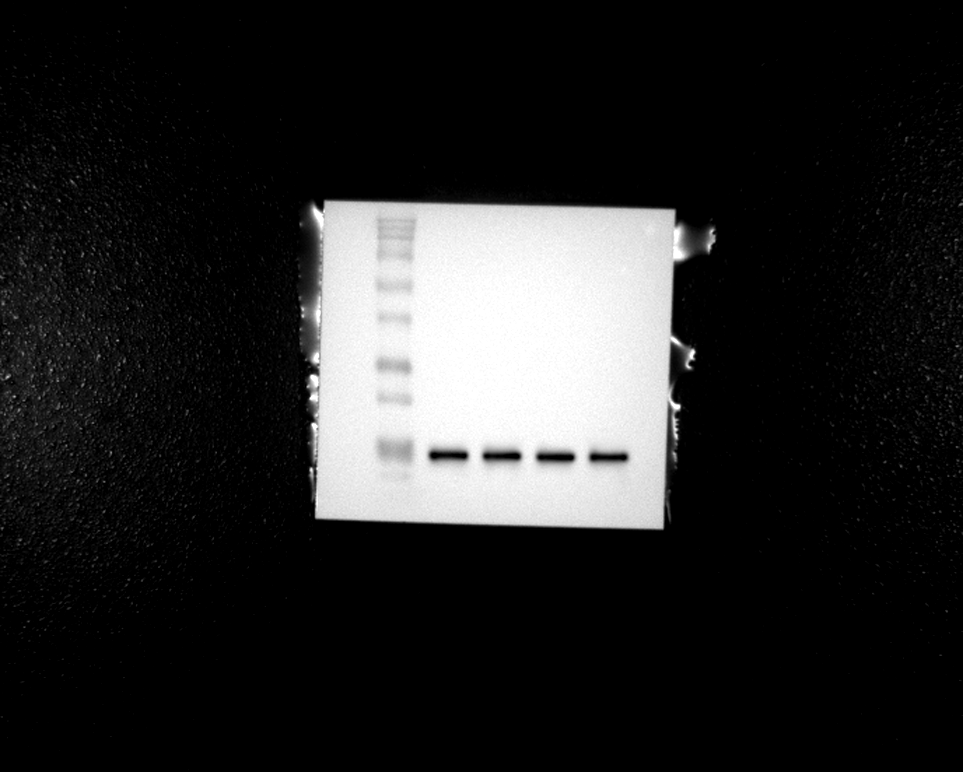


Mitochondrial Cyt c 12kd


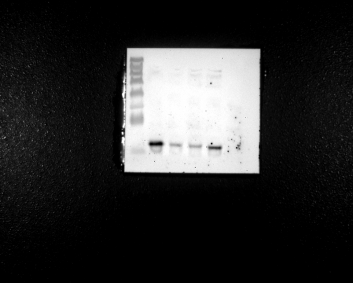

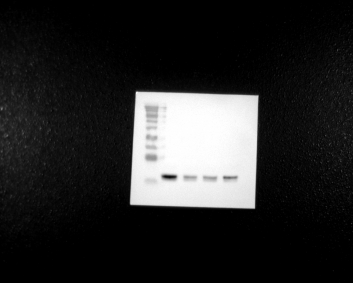

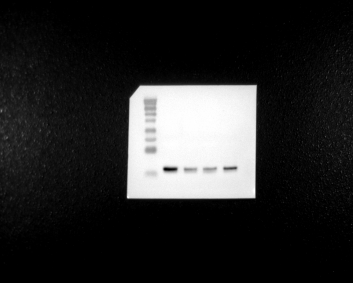


**Figure9**

IB:βactin 42kd IB:Dvl 85kd


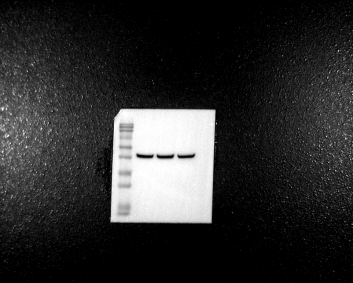

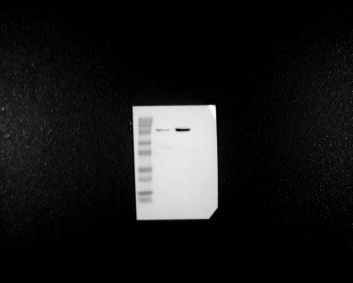


IB:SDC 85kd IB:SDC 24kd


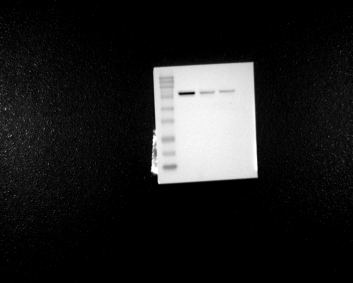

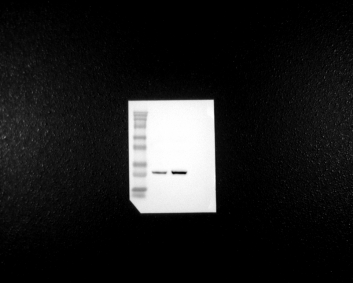


IB:Dvl 24kd


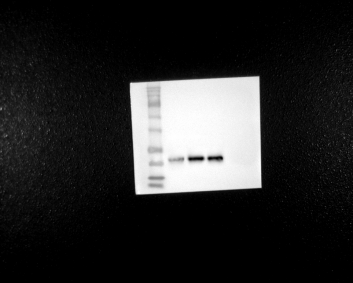


**Figure10**

**Cytosolic**

βactin 42kd


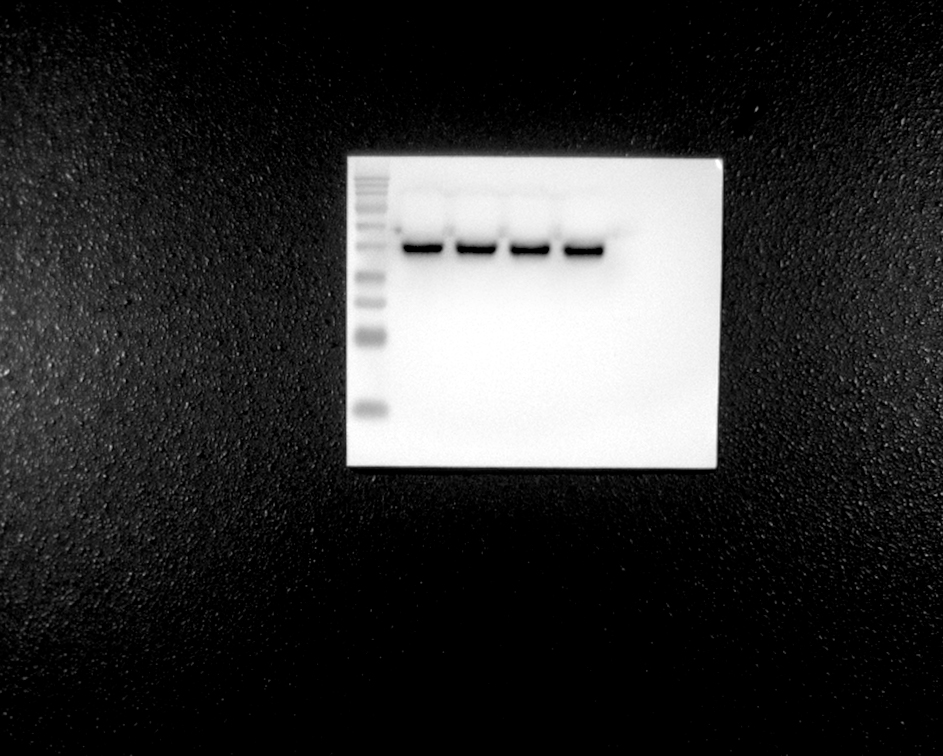

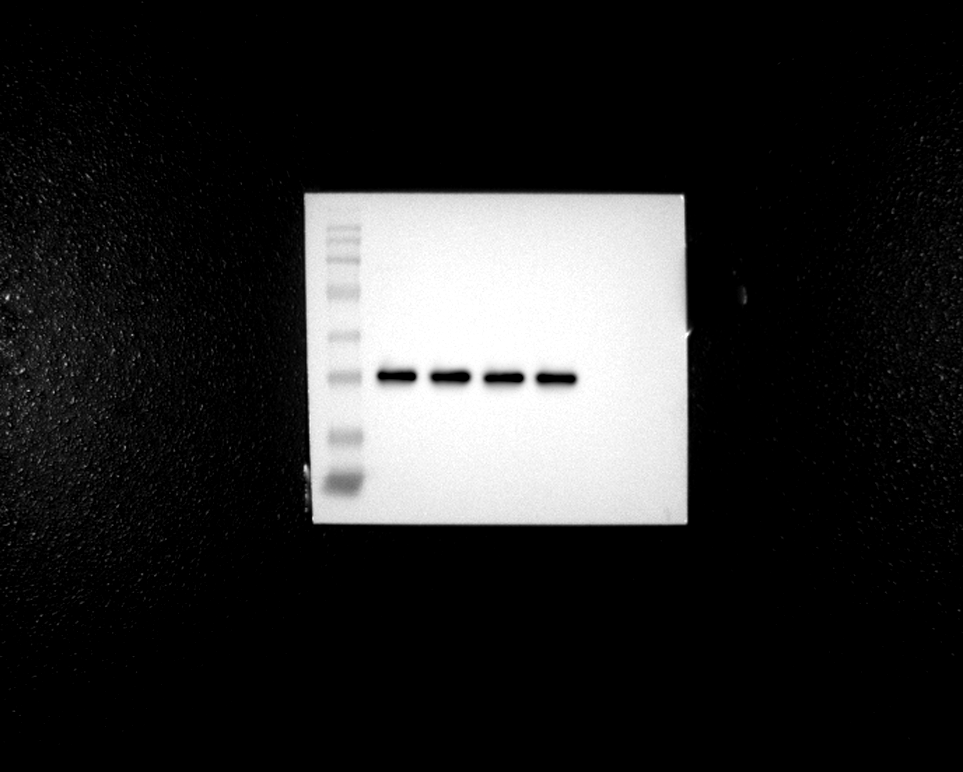

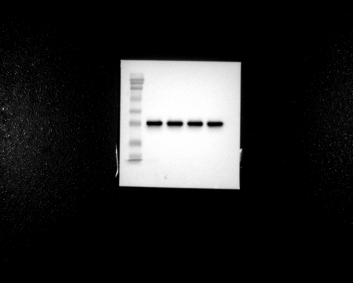


βcatenin 92kd

**
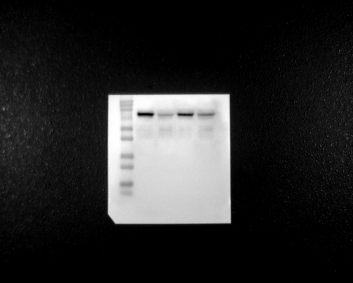

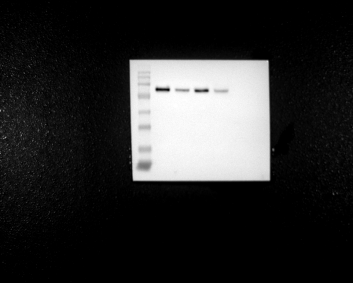

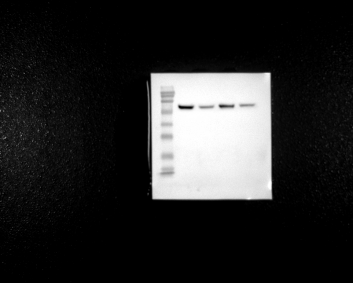
**

Axin 110kd


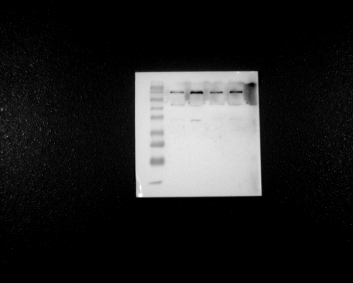

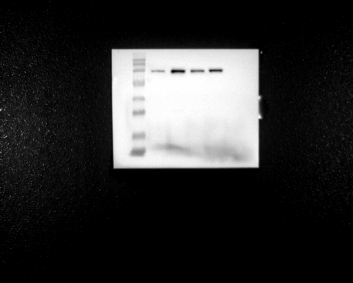

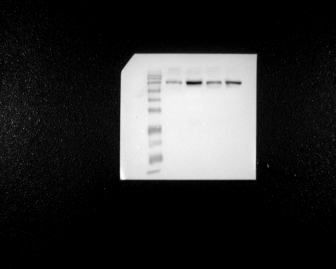


APC 160kd


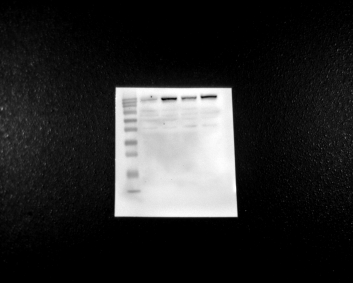

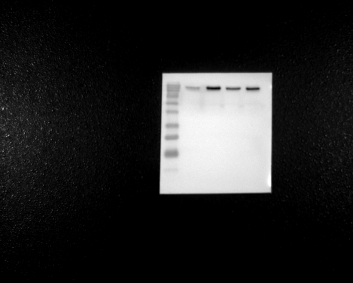

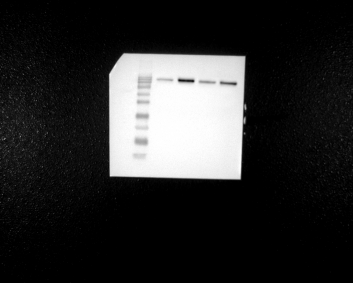


**Nuclear**

βcatenin 92kd

**
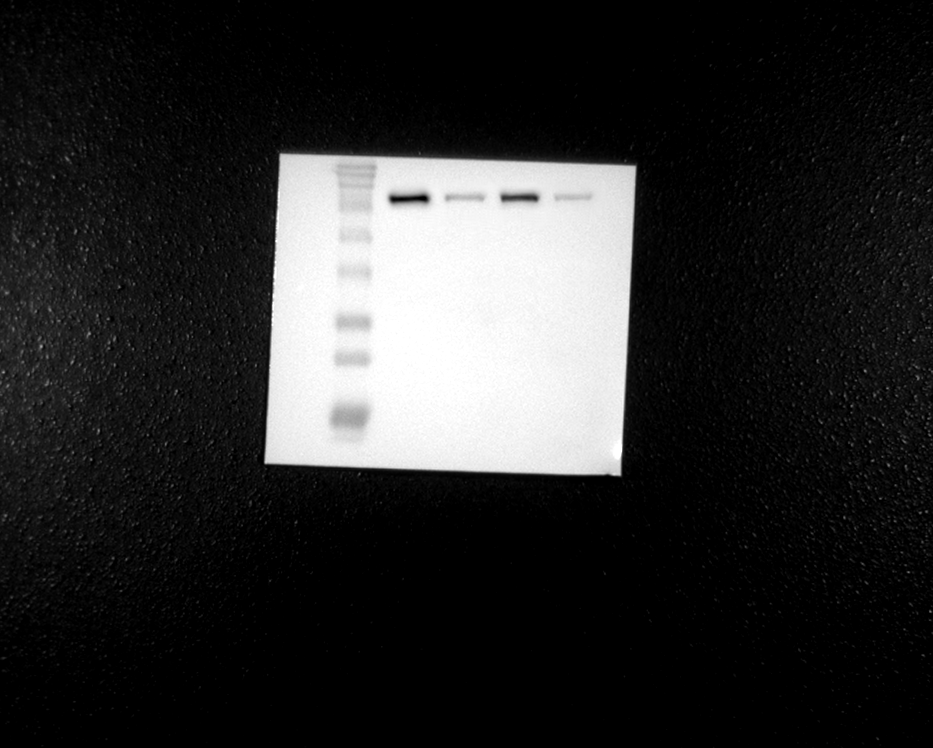

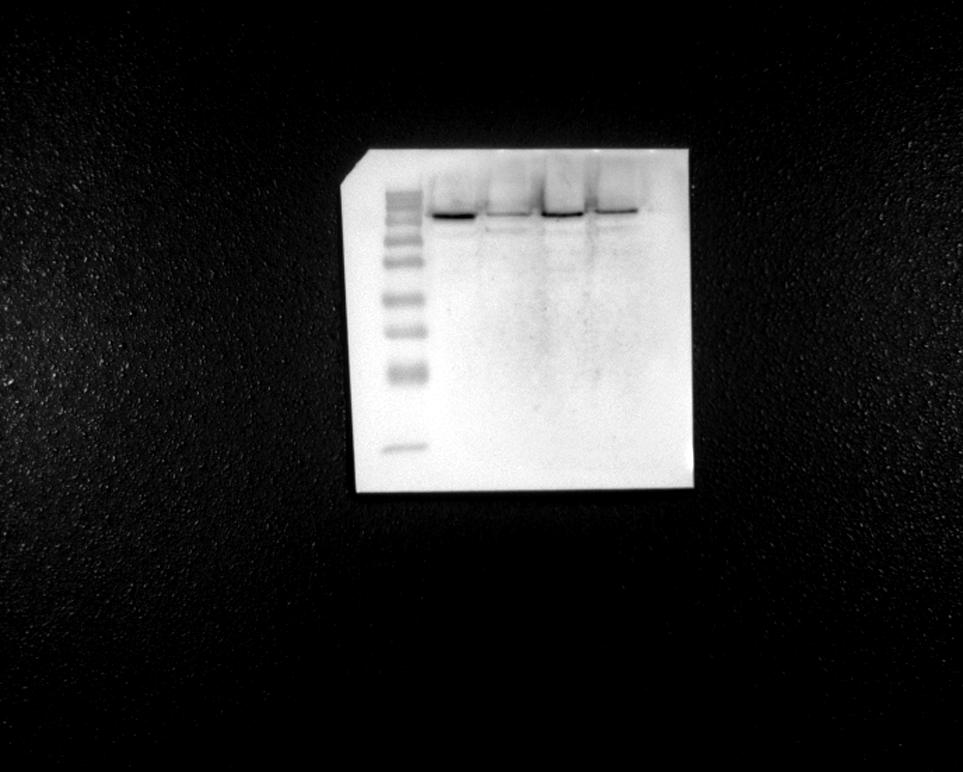

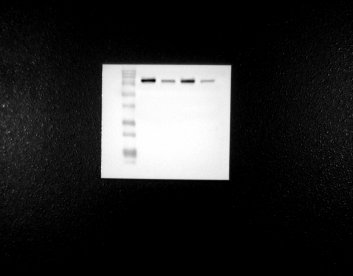
**

Histone H3 17kd


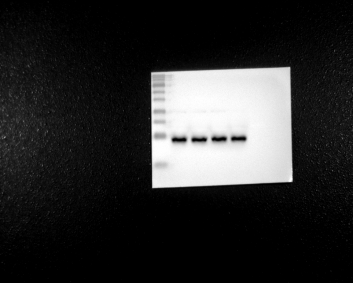

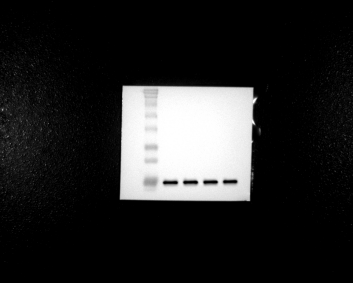

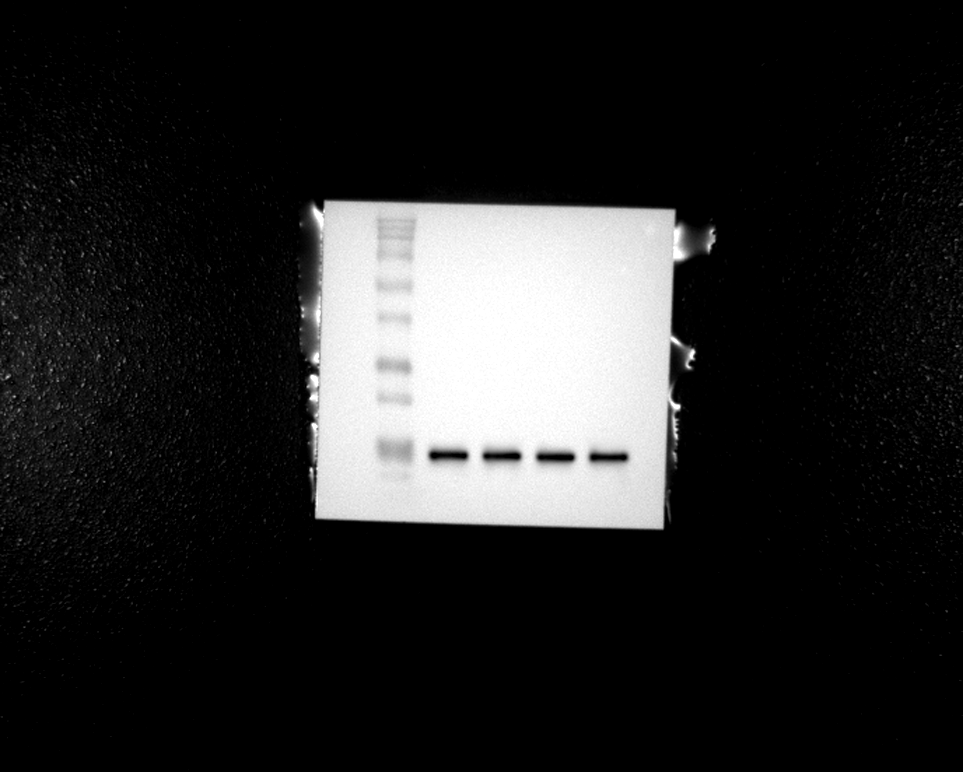

Supplement: Supplementary file 1 [file f8a47c6543efc39e00683012.docx]
